# Supplementary material
Source: PubMed Central journal article supplement (PMC3695363)
Supplement: supp_blood-2013-03-490763_Document1.pdf [file supp_blood-2013-03-490763_Document1.pdf]

# **Imatinib Disrupts Lymphoma Angiogenesis by Targeting Vascular Pericytes**

Jia Ruan<sup>1§</sup>, Min Luo<sup>2</sup>, Chunjie Wang<sup>1</sup>, Lei Fan<sup>1\*</sup>, Shao Ning Yang<sup>1</sup>, Mariano Cardenas<sup>1</sup>, Huimin Geng<sup>1#</sup>, John P. Leonard<sup>1</sup>, Ari Melnick<sup>1</sup>, Leandro Cerchietti<sup>1§</sup>, and Katherine A. Hajjar<sup>2</sup>

Division of Hematology/Oncology, Department of Medicine<sup>1</sup>, Department of Cell and Developmental Biology<sup>2</sup>, Weill Cornell Medical College, New York, NY

§ Co-corresponding authors

\* Current address: Department of Hematology, the First Affiliated Hospital of Nanjing Medical University, Nanjing, China

# Current address: Department of Laboratory Medicine, University of California, San Francisco

Supported in part by an ASCO Career Development Award and NIH grant K08HL091517 to J.R.; HL090985, HL042493 to K.A.H.

## **Corresponding Authors**

Jia Ruan, M.D., Ph.D.  
Division of Hematology/Oncology  
Department of Medicine  
Weill Cornell Medical College  
1300 York Avenue  
New York, NY 10065, USA  
Tel: 646-962-2064  
Fax: 646-962-1605  
Email: [jruan@med.cornell.edu](mailto:jruan@med.cornell.edu)

Leandro Cerchietti, M.D.  
Division of Hematology/Oncology  
Department of Medicine  
Weill Cornell Medical College  
1300 York Avenue  
New York, NY 10065, USA  
Tel: 212-746-7622  
Fax: 212-746-8866  
Email: [lcc2010@med.cornell.edu](mailto:lcc2010@med.cornell.edu)

## **Word Count**

Abstract: 187  
Words: 3998  
Figures: 7  
Supplemental Tables: 3  
Supplemental Figures: 5

## **Running Title**

Imatinib targets lymphoma vasculature

## **Conflict-of-interest Statement**

None

## **ONLINE SUPPLEMENTAL MATERIAL**

### **Supplemental Material and Methods**

#### ***Isolation of Vascular Smooth Muscle Cells***

Murine aortic vascular smooth muscle cells (VSMCs) were obtained by a modification of the explant method originally described by Ross <sup>47</sup>. Briefly, medial tissue was separated from segments of the thoracic aorta and incubated in dissection medium containing 165 U/mL collagenase type I (Worthington Biochemical Co, Lakewood, NJ), 15 U/mL elastase type III (Sigma-Aldrich, St. Louis, MO), and 0.375 mg/mL soybean trypsin inhibitor (Worthington) at 37°C. Partially digested tissues were placed in 6-well plates and cultured for several weeks in DMEM with 10% FBS supplemented with P/S. To isolate PDGFR $\beta$ <sup>+</sup> cells, 2 - 3 million confluent primary murine VSMCs were detached with Gibco 0.02% trypsin-EDTA (Invitrogen, Calsbad, CA), rinsed with sterile PBS/2% FBS, and resuspended in 200  $\mu$ L of PBS/2%FBS. The single cell suspension was then incubated with saturating concentrations of anti-PDGFR $\beta$ -PE antibody (eBioscience, San Diego, CA) for 30 mins on ice, washed in PBS/2%FBS, and sorted using the FACSVantage (Becton Dickinson, Mountain View, CA). The recovered PDGFR $\beta$ <sup>+</sup> cells were cultured in DMEM with 10% FBS supplemented with penicillin/streptomycin. Cells at passages 5-10 were used for the experiments.

#### ***Isolation of Cardiac Microvascular Endothelial Cells***

CMECs were isolated from neonatal day 2 murine hearts and evaluated by cell surface expression of VE-cadherin as previously described <sup>48</sup>. The cells were maintained in DMEM/F12 Medium with 20% FCS, endothelial cell growth supplement and P/S. Passage 2 CMECs were used for EC growth inhibition assays.

### ***FACS sorting of lymphoma-associated CD45<sup>-</sup>PDGFR $\beta$ <sup>+</sup> stromal cells***

Mononuclear cell suspensions were prepared from OCI-Ly7 or Farage lymphoma xenografts treated with either imatinib or PBS for 72 hours. Human CD45<sup>+</sup> cells were removed from the mononuclear fractions with the EasySep human CD45 depletion kit (StemCell Technologies, Vancouver, BC, Canada). The remainder of the mononuclear cell fractions was labeled with anti-human CD45-FITC, anti-mouse CD45-PerCP, anti-mouse CD140b-PE, and subjected to FACS sorting on a FACSArialIII cell sorter (Becton Dickinson, San Jose, CA). The sorted cells were immediately preserved in Trizol (Invitrogen, Grand Island, NY) reagent for RNA extraction.

### ***ELISA for VEGF and TGF- $\beta$***

Passage 2 murine VSMCs and CMECs were used for the VEGFA and TGF- $\beta$ 1 secretion tests, assayed with the eBioscience VEGF and TGF- $\beta$ 1 ELISA kits. Cells were cultured by phenol red free basic media with 5% BSA. All samples were triplicate.

### ***Immunohistochemistry***

VSMC cells grown in chamber slides (Nunc, Naperville, Illinois) were washed with PBS and fixed in 4% PFA for 20 minutes at RT, followed by permeabilization in 0.2% Triton x-100 for 10 minutes. The fixed slides were then subjected to a standard staining protocol using either color- or fluorescence-based detection methods.

### ***Gene Expression Microarray Analysis***

Total RNA from cells used for microarray analysis was isolated by RNeasy (Qiagen, Valencia, CA) purification. RNA quality was assessed using an Agilent Bioanalyzer (Agilent Technologies, Santa Clara, CA) and the 28S:18S rRNA ratios of all samples. cDNA was

generated from 5  $\mu$ g of total RNA using a poly(dT) oligonucleotide that contains a T7 RNA polymerase initiation site and the SuperScript III Reverse Transcriptase (Invitrogen, Carlsbad, CA). Biotinylated cDNA was generated and fragmented according to the NimbleGen protocol and hybridized to NimbleGen MM8\_60mer two color mouse gene expression microarrays (Roche NimbleGen, Inc. WI, USA). Samples from imatinib-treated cells (24 h & 48 h) were labeled by Cy5 and the non-treated cells (0 h) were labeled by Cy3. After scanning (NimbleGen MS 200 scanner) of the MM8 arrays, the generated pair files were imported to NimbleScan software (version 2.5.26) and processed using the RMA algorithm (Robust Multi-array Analysis) for normalization and summarization<sup>49</sup>. Signal intensities of probesets for the treated cells were compared to the intensities of the untreated cells using R 2.8.0 software and the probesets with ratios of two-fold or greater were exported to Ingenuity Pathway Analysis (IPA) (Ingenuity Systems, Redwood City, CA). Gene expression microarray data is available at the GEO database (accession number GSE30752).

### ***Real time PCR***

RNA was extracted from mouse VSMC at baseline and after 24 and 48 h of treatment with imatinib using RNeasy Plus kit (Qiagen) following the manufacturer's instructions. cDNA was synthesized using the High Capacity RNA-to-cDNA kit (Applied Biosystems, Carlsbad, CA). Selected genes were amplified using specific primers listed in **Supplemental Table 1** based on the Fast SYBR Green conditions (initial step of 20 sec at 95C followed by 40 cycles of 1 sec at 95C and 20 sec at 60C). The average CT values of the control gene (HPRT) were subtracted from corresponding genes of interest to derive  $\Delta$ CT. The standard deviation of the difference was calculated from the standard deviation of the CT values (triplicates). Then, the  $\Delta$ CT values of the imatinib-treated cells were expressed relative to their respective control-treated cells using the

$\Delta\Delta\text{CT}$  method. The fold expression for each gene in cells treated with the drug relative to control treated cells is determined by the expression:  $2^{-\Delta\Delta\text{CT}}$ . Results were represented as fold expression with the standard error of the mean (SEM) for three series of triplicates.

**Supplemental Table 1: Real-time PCR Primer Sequences**

| <b>Gene</b>     | <b>Primer Sequence</b> |                                                           |
|-----------------|------------------------|-----------------------------------------------------------|
| <i>GADD45A</i>  | Forward<br>Reverse     | 5'-TGAGCTGCTGCTACTGGAGA-3'<br>5'-TCCCGGCAAAAACAAATAAG-3'  |
| <i>RFC5</i>     | Forward<br>Reverse     | 5'-TTGGGAAGGTGACAGAGGAG-3'<br>5'-CCAAGCCCTTCAGAGTCTTC-3'  |
| <i>CCNE1</i>    | Forward<br>Reverse     | 5'-CACAACTCCAGACCCACAC-3'<br>5'-ACTCGGAGGAGGAGAAATCC-3'   |
| <i>TIMP1</i>    | Forward<br>Reverse     | 5'-ATCAGTGCCTGCAGCTTCTT-3'<br>5'-TCACTCTCCAGTTTGCAAGG-3'  |
| <i>SERPINE1</i> | Forward<br>Reverse     | 5'-AGACAATGGAAGGGCAACAT-3'<br>5'-GCCAGGGTTGCACTAAACAT-3'  |
| <i>KIT</i>      | Forward<br>Reverse     | 5'-AAAGGCCAACATTCAAGCAG-3'<br>5'-GAGTTGACCCTCACGGAATG-3'  |
| <i>MMP3</i>     | Forward<br>Reverse     | 5'-AGATCGATGCTGCCATTTCT-3'<br>5'-GGCTCCATGGATTGTTTCTT-3'  |
| <i>MMP12</i>    | Forward<br>Reverse     | 5'-TGATGCAGCTGTCTTTGACC-3'<br>5'-ATGAGCTCCTGCCTCACATC-3'  |
| <i>MMP13</i>    | Forward<br>Reverse     | 5'-TTTGAGAACACGGGGGAAGAC-3'<br>5'-ATGAGGCGGGGATAATCTTT-3' |
| <i>IL6</i>      | Forward<br>Reverse     | 5'-CAAAGCCAGAGTCCTTCAGAG-3'<br>5'-GCCACTCCTTCTGTGACTCC-3' |

**Supplemental Table 2: Imatinib Mesylate Induces Differentially Expressed Genes in Vascular Smooth Muscle Cells**

| <b>Fold Change</b> | <b>ID</b> | <b>Symbol</b> | <b>Entrez Gene Name</b>                                                | <b>Location</b>     | <b>Type(s)</b>          |
|--------------------|-----------|---------------|------------------------------------------------------------------------|---------------------|-------------------------|
| -4.079             | Il1rl1    | IL1RL1        | interleukin 1 receptor-like 1                                          | Plasma Membrane     | transmembrane receptor  |
| -3.516             | Adam12    | ADAM12        | ADAM metallopeptidase domain 12                                        | Plasma Membrane     | peptidase               |
| -3.306             | Ppil5     | PPIL5         | peptidylprolyl isomerase (cyclophilin)-like 5                          | unknown             | enzyme                  |
| -3.289             | Casc5     | CASC5         | cancer susceptibility candidate 5                                      | Nucleus             | other                   |
| -3.282             | Esco2     | ESCO2         | establishment of cohesion 1 homolog 2 (S. cerevisiae)                  | Nucleus             | other                   |
| -3.274             | Shebp1    | SHCBP1        | SHC SH2-domain binding protein 1                                       | unknown             | other                   |
| -3.267             | Esco2     | ESCO2         | establishment of cohesion 1 homolog 2 (S. cerevisiae)                  | Nucleus             | other                   |
| -3.239             | Ccne2     | CCNE2         | cyclin E2                                                              | Nucleus             | other                   |
| -3.228             | Matn3     | MATN3         | matrilin 3                                                             | Extracellular Space | other                   |
| -3.202             | Tnfsf18   | TNFSF18       | tumor necrosis factor (ligand) superfamily, member 18                  | Extracellular Space | cytokine                |
| -3.153             | Cdca1     | NUF2          | NUF2, NDC80 kinetochore complex component, homolog (S. cerevisiae)     | Nucleus             | other                   |
| -3.138             | Cdca1     | NUF2          | NUF2, NDC80 kinetochore complex component, homolog (S. cerevisiae)     | Nucleus             | other                   |
| -3.131             | Fbxo5     | FBXO5         | F-box protein 5                                                        | Nucleus             | enzyme                  |
| -3.116             | Ntrk3     | NTRK3         | neurotrophic tyrosine kinase, receptor, type 3                         | Plasma Membrane     | kinase                  |
| -3.115             | Shebp1    | SHCBP1        | SHC SH2-domain binding protein 1                                       | unknown             | other                   |
| -3.074             | Melk      | MELK          | maternal embryonic leucine zipper kinase                               | Cytoplasm           | kinase                  |
| -3.065             | Cab39l    | CAB39L        | calcium binding protein 39-like                                        | unknown             | other                   |
| -3.042             | C79407    | C14orf106     | chromosome 14 open reading frame 106                                   | Nucleus             | other                   |
| -3.041             | Ect2      | ECT2          | epithelial cell transforming sequence 2 oncogene                       | Nucleus             | other                   |
| -3.023             | Ppil5     | PPIL5         | peptidylprolyl isomerase (cyclophilin)-like 5                          | unknown             | enzyme                  |
| -3.007             | Slc16a4   | SLC16A4       | solute carrier family 16, member 4 (monocarboxylic acid transporter 5) | Plasma Membrane     | transporter             |
| -3.002             | Mki67     | MKI67         | antigen identified by monoclonal antibody Ki-67                        | Nucleus             | other                   |
| -2.984             | Casc5     | CASC5         | cancer susceptibility candidate 5                                      | Nucleus             | other                   |
| -2.967             | Mybl2     | MYBL2         | v-myb myeloblastosis viral oncogene homolog (avian)-like 2             | Nucleus             | transcription regulator |
| -2.947             | E2f7      | E2F7          | E2F transcription factor 7                                             | Nucleus             | transcription regulator |
| -2.941             | Ccne2     | CCNE2         | cyclin E2                                                              | Nucleus             | other                   |
| -2.935             | Pbk       | PBK           | PDZ binding kinase                                                     | Cytoplasm           | kinase                  |
| -2.914             | Mlf1      | MLF1          | myeloid leukemia factor 1                                              | Nucleus             | other                   |
| -2.913             | Kif15     | KIF15         | kinesin family member 15                                               | Nucleus             | other                   |
| -2.910             | Neil3     | NEIL3         | nei endonuclease VIII-like 3 (E. coli)                                 | Nucleus             | enzyme                  |
| -2.897             | Ect2      | ECT2          | epithelial cell transforming sequence 2 oncogene                       | Nucleus             | other                   |
| -2.871             | Rad51ap1  | RAD51AP1      | RAD51 associated protein 1                                             | Nucleus             | other                   |
| -2.861             | Bub1      | BUB1          | budding uninhibited by benzimidazoles 1 homolog (yeast)                | Nucleus             | kinase                  |
| -2.860             | Neil3     | NEIL3         | nei endonuclease VIII-like 3 (E. coli)                                 | Nucleus             | enzyme                  |
| -2.844             | Aspm      | ASPM          | asp (abnormal spindle) homolog, microcephaly associated (Drosophila)   | Nucleus             | other                   |

|        |         |                                |                                                                                               |                     |                         |
|--------|---------|--------------------------------|-----------------------------------------------------------------------------------------------|---------------------|-------------------------|
| -2.844 | Clspn   | CLSPN                          | Claspin                                                                                       | Nucleus             | other                   |
| -2.834 | Hells   | HELLS                          | helicase, lymphoid-specific                                                                   | Nucleus             | enzyme                  |
| -2.828 | Klk8    | KLK8                           | kallikrein-related peptidase 8                                                                | Extracellular Space | peptidase               |
| -2.827 | Pbk     | PBK                            | PDZ binding kinase                                                                            | Cytoplasm           | kinase                  |
| -2.812 | Brip1   | BRIP1                          | BRCA1 interacting protein C-terminal helicase 1                                               | Nucleus             | enzyme                  |
| -2.810 | C79407  | C14orf106                      | chromosome 14 open reading frame 106                                                          | Nucleus             | other                   |
| -2.807 | C79407  | C14orf106                      | chromosome 14 open reading frame 106                                                          | Nucleus             | other                   |
| -2.802 | Ttk     | TTK                            | TTK protein kinase                                                                            | Nucleus             | kinase                  |
| -2.799 | Ect2    | ECT2                           | epithelial cell transforming sequence 2 oncogene                                              | Nucleus             | other                   |
| -2.784 | Ccne2   | CCNE2                          | cyclin E2                                                                                     | Nucleus             | other                   |
| -2.779 | Ect2    | ECT2                           | epithelial cell transforming sequence 2 oncogene                                              | Nucleus             | other                   |
| -2.774 | Fbxo5   | FBXO5                          | F-box protein 5                                                                               | Nucleus             | enzyme                  |
| -2.766 | Il18rap | IL18RAP                        | interleukin 18 receptor accessory protein                                                     | Plasma Membrane     | transmembrane receptor  |
| -2.750 | Slurp1  | SLURP1                         | secreted LY6/PLAUR domain containing 1                                                        | Extracellular Space | cytokine                |
| -2.744 | Ttk     | TTK                            | TTK protein kinase                                                                            | Nucleus             | kinase                  |
| -2.741 | Akap5   | AKAP5                          | A kinase (PRKA) anchor protein 5                                                              | Plasma Membrane     | other                   |
| -2.737 | E2f7    | E2F7                           | E2F transcription factor 7                                                                    | Nucleus             | transcription regulator |
| -2.737 | Itgb6   | ITGB6                          | integrin, beta 6                                                                              | Plasma Membrane     | other                   |
| -2.737 | Kif11   | KIF11                          | kinesin family member 11                                                                      | Nucleus             | other                   |
| -2.733 | Il6     | IL6                            | interleukin 6 (interferon, beta 2)                                                            | Extracellular Space | cytokine                |
| -2.722 | Luzp5   | NCAPG2                         | non-SMC condensin II complex, subunit G2                                                      | Nucleus             | other                   |
| -2.714 | Cenpe   | CENPE                          | centromere protein E, 312kDa                                                                  | Nucleus             | other                   |
| -2.707 | Sprr2a  | SPRR2A<br>(includes<br>others) | small proline-rich protein 2A                                                                 | Cytoplasm           | other                   |
| -2.695 | Cep55   | CEP55                          | centrosomal protein 55kDa                                                                     | unknown             | other                   |
| -2.671 | Cep55   | CEP55                          | centrosomal protein 55kDa                                                                     | unknown             | other                   |
| -2.671 | Chek1   | CHEK1                          | CHK1 checkpoint homolog (S. pombe)                                                            | Nucleus             | kinase                  |
| -2.666 | Cenpe   | CENPE                          | centromere protein E, 312kDa                                                                  | Nucleus             | other                   |
| -2.662 | Tk1     | TK1                            | thymidine kinase 1, soluble                                                                   | Cytoplasm           | kinase                  |
| -2.661 | Prr11   | PRR11                          | proline rich 11                                                                               | unknown             | other                   |
| -2.657 | E2f8    | E2F8                           | E2F transcription factor 8                                                                    | Nucleus             | other                   |
| -2.654 | Figl1   | FIGNL1                         | fidgetin-like 1                                                                               | unknown             | enzyme                  |
| -2.653 | Birc5   | BIRC5                          | baculoviral IAP repeat-containing 5                                                           | Cytoplasm           | other                   |
| -2.651 | Cdca2   | CDCA2                          | cell division cycle associated 2                                                              | Nucleus             | other                   |
| -2.647 | Ercc6l  | ERCC6L                         | excision repair cross-complementing rodent repair deficiency,<br>complementation group 6-like | Nucleus             | other                   |
| -2.645 | Ckap2l  | CKAP2L                         | cytoskeleton associated protein 2-like                                                        | unknown             | other                   |
| -2.640 | Kntc2   | NDC80                          | NDC80 homolog, kinetochore complex component (S. cerevisiae)                                  | Nucleus             | other                   |



|        |          |          |                                                                               |                     |                         |
|--------|----------|----------|-------------------------------------------------------------------------------|---------------------|-------------------------|
| -2.640 | Rad54l   | RAD54L   | RAD54-like ( <i>S. cerevisiae</i> )                                           | Nucleus             | enzyme                  |
| -2.638 | Ccna2    | CCNA2    | cyclin A2                                                                     | Nucleus             | other                   |
| -2.635 | Exo1     | EXO1     | exonuclease 1                                                                 | Nucleus             | enzyme                  |
| -2.630 | Prc1     | PRC1     | protein regulator of cytokinesis 1                                            | Nucleus             | other                   |
| -2.630 | Sgol1    | SGOL1    | shugoshin-like 1 ( <i>S. pombe</i> )                                          | Nucleus             | other                   |
| -2.627 | Chek1    | CHEK1    | CHK1 checkpoint homolog ( <i>S. pombe</i> )                                   | Nucleus             | kinase                  |
| -2.619 | Stat4    | STAT4    | signal transducer and activator of transcription 4                            | Nucleus             | transcription regulator |
| -2.617 | Top2a    | TOP2A    | topoisomerase (DNA) II alpha 170kDa                                           | Nucleus             | enzyme                  |
| -2.614 | Mlf1     | MLF1     | myeloid leukemia factor 1                                                     | Nucleus             | other                   |
| -2.598 | Kif20a   | KIF20A   | kinesin family member 20A                                                     | Cytoplasm           | transporter             |
| -2.598 | Nusap1   | NUSAP1   | nucleolar and spindle associated protein 1                                    | Nucleus             | other                   |
| -2.592 | Aurka    | AURKA    | aurora kinase A                                                               | Nucleus             | kinase                  |
| -2.567 | Aspm     | ASPM     | asp (abnormal spindle) homolog, microcephaly associated ( <i>Drosophila</i> ) | Nucleus             | other                   |
| -2.566 | Ect2     | ECT2     | epithelial cell transforming sequence 2 oncogene                              | Nucleus             | other                   |
| -2.563 | Birc5    | BIRC5    | baculoviral IAP repeat-containing 5                                           | Cytoplasm           | other                   |
| -2.562 | Rad51ap1 | RAD51AP1 | RAD51 associated protein 1                                                    | Nucleus             | other                   |
| -2.559 | Il6      | IL6      | interleukin 6 (interferon, beta 2)                                            | Extracellular Space | cytokine                |
| -2.558 | Ccnb1    | CCNB1    | cyclin B1                                                                     | Nucleus             | other                   |
| -2.558 | Cd244    | CD244    | CD244 molecule, natural killer cell receptor 2B4                              | Plasma Membrane     | other                   |
| -2.553 | Ckap2l   | CKAP2L   | cytoskeleton associated protein 2-like                                        | unknown             | other                   |
| -2.553 | Orc1l    | ORC1     | origin recognition complex, subunit 1                                         | Nucleus             | other                   |
| -2.551 | Luzp5    | NCAPG2   | non-SMC condensin II complex, subunit G2                                      | Nucleus             | other                   |
| -2.543 | Kntc2    | NDC80    | NDC80 homolog, kinetochore complex component ( <i>S. cerevisiae</i> )         | Nucleus             | other                   |
| -2.542 | Smc2l1   | SMC2     | structural maintenance of chromosomes 2                                       | Nucleus             | transporter             |
| -2.534 | Mphosph1 | KIF20B   | kinesin family member 20B                                                     | Nucleus             | enzyme                  |
| -2.533 | Kif23    | KIF23    | kinesin family member 23                                                      | Cytoplasm           | other                   |
| -2.532 | Melk     | MELK     | maternal embryonic leucine zipper kinase                                      | Cytoplasm           | kinase                  |
| -2.530 | Mybl2    | MYBL2    | v-myb myeloblastosis viral oncogene homolog (avian)-like 2                    | Nucleus             | transcription regulator |
| -2.530 | Polq     | POLQ     | polymerase (DNA directed), theta                                              | Nucleus             | enzyme                  |
| -2.530 | Tll1     | TLL1     | tolloid-like 1                                                                | Extracellular Space | peptidase               |
| -2.528 | Bub1b    | BUB1B    | budding uninhibited by benzimidazoles 1 homolog beta (yeast)                  | Nucleus             | kinase                  |
| -2.528 | Lrrc4c   | LRRC4C   | leucine rich repeat containing 4C                                             | Plasma Membrane     | other                   |
| -2.527 | Cep55    | CEP55    | centrosomal protein 55kDa                                                     | unknown             | other                   |
| -2.525 | Brcal    | BRCA1    | breast cancer 1, early onset                                                  | Nucleus             | transcription regulator |
| -2.524 | Slurp1   | SLURP1   | secreted LY6/PLAUR domain containing 1                                        | Extracellular Space | cytokine                |
| -2.520 | Atp6v1c2 | ATP6V1C2 | ATPase, H <sup>+</sup> transporting, lysosomal 42kDa, V1 subunit C2           | unknown             | transporter             |
| -2.511 | Tk1      | TK1      | thymidine kinase 1, soluble                                                   | Cytoplasm           | kinase                  |
| -2.507 | Atp6v1c2 | ATP6V1C2 | ATPase, H <sup>+</sup> transporting, lysosomal 42kDa, V1 subunit C2           | unknown             | transporter             |

|        |          |                                |                                                          |                     |                            |
|--------|----------|--------------------------------|----------------------------------------------------------|---------------------|----------------------------|
| -2.507 | Fancb    | FANCB                          | Fanconi anemia, complementation group B                  | Nucleus             | other                      |
| -2.502 | Cenpf    | CENPF                          | centromere protein F, 350/400kDa (mitosin)               | Nucleus             | other                      |
| -2.500 | Mcm10    | MCM10                          | minichromosome maintenance complex component 10          | Nucleus             | other                      |
| -2.490 | Dlg7     | DLGAP5                         | discs, large (Drosophila) homolog-associated protein 5   | Nucleus             | phosphatase                |
| -2.478 | Synpo    | SYNPO                          | Synaptopodin                                             | Cytoplasm           | other                      |
| -2.476 | Il1rl1   | IL1RL1                         | interleukin 1 receptor-like 1                            | Plasma Membrane     | transmembrane receptor     |
| -2.473 | Fancd2   | FANCD2                         | Fanconi anemia, complementation group D2                 | Nucleus             | other                      |
| -2.468 | Anln     | ANLN                           | anillin, actin binding protein                           | Cytoplasm           | other                      |
| -2.467 | Ccnb1    | CCNB1                          | cyclin B1                                                | Nucleus             | other                      |
| -2.467 | My17     | MYL7                           | myosin, light chain 7, regulatory                        | Cytoplasm           | enzyme                     |
| -2.463 | Aurka    | AURKA                          | aurora kinase A                                          | Nucleus             | kinase                     |
| -2.457 | Prss35   | PRSS35                         | protease, serine, 35                                     | Extracellular Space | peptidase                  |
| -2.456 | Mcm10    | MCM10                          | minichromosome maintenance complex component 10          | Nucleus             | other                      |
| -2.456 | Rad51ap1 | RAD51AP1                       | RAD51 associated protein 1                               | Nucleus             | other                      |
| -2.456 | Sox11    | SOX11                          | SRY (sex determining region Y)-box 11                    | Nucleus             | transcription regulator    |
| -2.455 | Nasp     | NASP                           | nuclear autoantigenic sperm protein (histone-binding)    | Nucleus             | other                      |
| -2.454 | Asf1b    | ASF1B                          | ASF1 anti-silencing function 1 homolog B (S. cerevisiae) | Nucleus             | other                      |
| -2.451 | Gsg2     | GSG2                           | germ cell associated 2 (haspin)                          | Nucleus             | kinase                     |
| -2.449 | Plk1     | PLK1                           | polo-like kinase 1                                       | Nucleus             | kinase                     |
| -2.447 | Edg8     | S1PR5                          | sphingosine-1-phosphate receptor 5                       | Plasma Membrane     | G-protein coupled receptor |
| -2.441 | Fshprh1  | CENPI                          | centromere protein I                                     | Nucleus             | other                      |
| -2.436 | Rrm2     | RRM2                           | ribonucleotide reductase M2                              | Nucleus             | enzyme                     |
| -2.433 | Troap    | TROAP                          | trophinin associated protein (tastin)                    | Cytoplasm           | peptidase                  |
| -2.430 | Orc1l    | ORC1                           | origin recognition complex, subunit 1                    | Nucleus             | other                      |
| -2.423 | Dlg7     | DLGAP5                         | discs, large (Drosophila) homolog-associated protein 5   | Nucleus             | phosphatase                |
| -2.419 | Esp1l    | ESPL1                          | extra spindle pole bodies homolog 1 (S. cerevisiae)      | Nucleus             | peptidase                  |
| -2.410 | Pmch     | PMCH                           | pro-melanin-concentrating hormone                        | Extracellular Space | other                      |
| -2.408 | Cd244    | CD244                          | CD244 molecule, natural killer cell receptor 2B4         | Plasma Membrane     | other                      |
| -2.404 | Col3a1   | COL3A1                         | collagen, type III, alpha 1                              | Extracellular Space | other                      |
| -2.402 | Upk1b    | UPK1B                          | uropod 1B                                                | Plasma Membrane     | other                      |
| -2.396 | Top2a    | TOP2A                          | topoisomerase (DNA) II alpha 170kDa                      | Nucleus             | enzyme                     |
| -2.395 | Fancb    | FANCB                          | Fanconi anemia, complementation group B                  | Nucleus             | other                      |
| -2.389 | Sgol1    | SGOL1                          | shugoshin-like 1 (S. pombe)                              | Nucleus             | other                      |
| -2.386 | Upk3b    | UPK3B                          | uropod 3B                                                | Plasma Membrane     | other                      |
| -2.384 | Pmch     | PMCH                           | pro-melanin-concentrating hormone                        | Extracellular Space | other                      |
| -2.383 | Spr2a    | SPRR2A<br>(includes<br>others) | small proline-rich protein 2A                            | Cytoplasm           | other                      |
| -2.382 | Msln     | MSLN                           | Mesothelin                                               | Extracellular Space | other                      |

|        |         |         |                                                       |                     |                            |
|--------|---------|---------|-------------------------------------------------------|---------------------|----------------------------|
| -2.382 | Sgol2   | SGOL2   | shugoshin-like 2 (S. pombe)                           | Nucleus             | other                      |
| -2.380 | Kif2c   | KIF2C   | kinesin family member 2C                              | Nucleus             | other                      |
| -2.375 | Luzp5   | NCAPG2  | non-SMC condensin II complex, subunit G2              | Nucleus             | other                      |
| -2.374 | Col11a1 | COL11A1 | collagen, type XI, alpha 1                            | Extracellular Space | other                      |
| -2.373 | Top2a   | TOP2A   | topoisomerase (DNA) II alpha 170kDa                   | Nucleus             | enzyme                     |
| -2.371 | Kif22   | KIF22   | kinesin family member 22                              | Nucleus             | other                      |
| -2.360 | Mrgprf  | MRGPRF  | MAS-related GPR, member F                             | Plasma Membrane     | G-protein coupled receptor |
| -2.360 | Spag5   | SPAG5   | sperm associated antigen 5                            | Nucleus             | peptidase                  |
| -2.358 | Nusap1  | NUSAP1  | nucleolar and spindle associated protein 1            | Nucleus             | other                      |
| -2.355 | Aurkb   | AURKB   | aurora kinase B                                       | Nucleus             | kinase                     |
| -2.341 | Gjb3    | GJB3    | gap junction protein, beta 3, 31kDa                   | Plasma Membrane     | transporter                |
| -2.327 | Casc5   | CASC5   | cancer susceptibility candidate 5                     | Nucleus             | other                      |
| -2.322 | Ccna2   | CCNA2   | cyclin A2                                             | Nucleus             | other                      |
| -2.322 | Wdhd1   | WDHD1   | WD repeat and HMG-box DNA binding protein 1           | Nucleus             | other                      |
| -2.318 | Phf19   | PHF19   | PHD finger protein 19                                 | unknown             | other                      |
| -2.316 | Ccne1   | CCNE1   | cyclin E1                                             | Nucleus             | transcription regulator    |
| -2.314 | Exo1    | EXO1    | exonuclease 1                                         | Nucleus             | enzyme                     |
| -2.313 | Iqgap3  | IQGAP3  | IQ motif containing GTPase activating protein 3       | unknown             | other                      |
| -2.311 | Dtl     | DTL     | denticleless homolog (Drosophila)                     | Nucleus             | other                      |
| -2.302 | Gjb3    | GJB3    | gap junction protein, beta 3, 31kDa                   | Plasma Membrane     | transporter                |
| -2.302 | Kif2c   | KIF2C   | kinesin family member 2C                              | Nucleus             | other                      |
| -2.299 | Cnot1   | CNOT1   | CCR4-NOT transcription complex, subunit 1             | unknown             | other                      |
| -2.297 | Gsg2    | GSG2    | germ cell associated 2 (haspin)                       | Nucleus             | kinase                     |
| -2.296 | Fxyd3   | FXYD3   | FXYD domain containing ion transport regulator 3      | Plasma Membrane     | ion channel                |
| -2.286 | Ccdc99  | CCDC99  | coiled-coil domain containing 99                      | Nucleus             | other                      |
| -2.286 | Cdca7   | CDCA7   | cell division cycle associated 7                      | Nucleus             | other                      |
| -2.278 | Kif20a  | KIF20A  | kinesin family member 20A                             | Cytoplasm           | transporter                |
| -2.276 | Ctsw    | CTSW    | cathepsin W                                           | Cytoplasm           | peptidase                  |
| -2.275 | Sprr1a  | SPRR1A  | small proline-rich protein 1A                         | Cytoplasm           | other                      |
| -2.274 | Rad51   | RAD51   | RAD51 homolog (RecA homolog, E. coli) (S. cerevisiae) | Nucleus             | enzyme                     |
| -2.262 | Polq    | POLQ    | polymerase (DNA directed), theta                      | Nucleus             | enzyme                     |
| -2.258 | Nid2    | NID2    | nidogen 2 (osteonidogen)                              | Extracellular Space | other                      |
| -2.254 | Rrm2    | RRM2    | ribonucleotide reductase M2                           | Nucleus             | enzyme                     |
| -2.244 | Copg    | COPG    | coatomer protein complex, subunit gamma               | Cytoplasm           | transporter                |
| -2.238 | Stil    | STIL    | SCL/TAL1 interrupting locus                           | Nucleus             | other                      |
| -2.235 | Brcal   | BRCA1   | breast cancer 1, early onset                          | Nucleus             | transcription regulator    |
| -2.234 | Muc15   | MUC15   | mucin 15, cell surface associated                     | Extracellular Space | other                      |
| -2.234 | Srpx2   | SRPX2   | sushi-repeat-containing protein, X-linked 2           | Cytoplasm           | other                      |

|        |         |                                |                                                                                    |                     |                            |
|--------|---------|--------------------------------|------------------------------------------------------------------------------------|---------------------|----------------------------|
| -2.230 | Dna21   | DNA2                           | DNA replication helicase 2 homolog (yeast)                                         | Cytoplasm           | other                      |
| -2.222 | Cmklr1  | CMKLR1                         | chemokine-like receptor 1                                                          | Plasma Membrane     | G-protein coupled receptor |
| -2.220 | Pole    | POLE                           | polymerase (DNA directed), epsilon                                                 | Nucleus             | enzyme                     |
| -2.218 | Col11a1 | COL11A1                        | collagen, type XI, alpha 1                                                         | Extracellular Space | other                      |
| -2.217 | Gcnt3   | GCNT3                          | glucosaminyl (N-acetyl) transferase 3, mucin type                                  | Plasma Membrane     | enzyme                     |
| -2.216 | Mal     | MAL                            | mal, T-cell differentiation protein                                                | Plasma Membrane     | transporter                |
| -2.209 | Cdc6    | CDC6                           | cell division cycle 6 homolog ( <i>S. cerevisiae</i> )                             | Nucleus             | other                      |
| -2.204 | Cdca7   | CDCA7                          | cell division cycle associated 7                                                   | Nucleus             | other                      |
| -2.200 | Sass6   | SASS6                          | spindle assembly 6 homolog ( <i>C. elegans</i> )                                   | Cytoplasm           | other                      |
| -2.197 | Cdca5   | CDCA5                          | cell division cycle associated 5                                                   | Cytoplasm           | other                      |
| -2.196 | Uhrf1   | UHRF1                          | ubiquitin-like with PHD and ring finger domains 1                                  | Nucleus             | transcription regulator    |
| -2.191 | Phf19   | PHF19                          | PHD finger protein 19                                                              | unknown             | other                      |
| -2.190 | Kif18a  | KIF18A                         | kinesin family member 18A                                                          | Cytoplasm           | other                      |
| -2.188 | Tcf19   | TCF19                          | transcription factor 19                                                            | Nucleus             | transcription regulator    |
| -2.177 | Mcm5    | MCM5                           | minichromosome maintenance complex component 5                                     | Nucleus             | enzyme                     |
| -2.176 | Brip1   | BRIP1                          | BRCA1 interacting protein C-terminal helicase 1                                    | Nucleus             | enzyme                     |
| -2.173 | Mal2    | MAL2                           | mal, T-cell differentiation protein 2                                              | Plasma Membrane     | transporter                |
| -2.170 | Cdc25c  | CDC25C                         | cell division cycle 25 homolog C ( <i>S. pombe</i> )                               | Nucleus             | phosphatase                |
| -2.167 | Eme1    | EME1                           | essential meiotic endonuclease 1 homolog 1 ( <i>S. pombe</i> )                     | Nucleus             | other                      |
| -2.164 | Foxm1   | FOXM1                          | forkhead box M1                                                                    | Nucleus             | transcription regulator    |
| -2.157 | Chtf18  | CHTF18                         | CTF18, chromosome transmission fidelity factor 18 homolog ( <i>S. cerevisiae</i> ) | unknown             | other                      |
| -2.157 | Iqgap3  | IQGAP3                         | IQ motif containing GTPase activating protein 3                                    | unknown             | other                      |
| -2.152 | Plk4    | PLK4                           | polo-like kinase 4                                                                 | Cytoplasm           | kinase                     |
| -2.151 | Sprr2b  | SPRR2A<br>(includes<br>others) | small proline-rich protein 2A                                                      | Cytoplasm           | other                      |
| -2.150 | Cdc20   | CDC20                          | cell division cycle 20 homolog ( <i>S. cerevisiae</i> )                            | Nucleus             | other                      |
| -2.147 | Casc5   | CASC5                          | cancer susceptibility candidate 5                                                  | Nucleus             | other                      |
| -2.145 | Mcm5    | MCM5                           | minichromosome maintenance complex component 5                                     | Nucleus             | enzyme                     |
| -2.144 | Lin9    | LIN9                           | lin-9 homolog ( <i>C. elegans</i> )                                                | Nucleus             | other                      |
| -2.141 | Cdc45l  | CDC45                          | cell division cycle 45 homolog ( <i>S. cerevisiae</i> )                            | Nucleus             | other                      |
| -2.136 | F2r1l   | F2RL1                          | coagulation factor II (thrombin) receptor-like 1                                   | Plasma Membrane     | G-protein coupled receptor |
| -2.135 | Mfap5   | MFAP5                          | microfibrillar associated protein 5                                                | Extracellular Space | other                      |
| -2.135 | Sprr2e  | SPRR2A<br>(includes<br>others) | small proline-rich protein 2A                                                      | Cytoplasm           | other                      |
| -2.133 | Nrip3   | NRIP3                          | nuclear receptor interacting protein 3                                             | unknown             | other                      |
| -2.132 | Mcm6    | MCM6                           | minichromosome maintenance complex component 6                                     | Nucleus             | enzyme                     |
| -2.132 | Upk1b   | UPK1B                          | uropod protein 1B                                                                  | Plasma Membrane     | other                      |

|        |          |          |                                                                                                               |                     |                         |
|--------|----------|----------|---------------------------------------------------------------------------------------------------------------|---------------------|-------------------------|
| -2.129 | Kif18a   | KIF18A   | kinesin family member 18A                                                                                     | Cytoplasm           | other                   |
| -2.118 | Mxd3     | MXD3     | MAX dimerization protein 3                                                                                    | Nucleus             | transcription regulator |
| -2.116 | Kntc1    | KNTC1    | kinetochore associated 1                                                                                      | Nucleus             | other                   |
| -2.112 | Cmah     | CMAH     | cytidine monophosphate-N-acetylneuraminic acid hydroxylase (CMP-N-acetylneuraminate monooxygenase) pseudogene | Cytoplasm           | enzyme                  |
| -2.110 | Edn2     | EDN2     | endothelin 2                                                                                                  | Extracellular Space | growth factor           |
| -2.106 | Mad211   | MAD2L1   | MAD2 mitotic arrest deficient-like 1 (yeast)                                                                  | Nucleus             | other                   |
| -2.102 | Gpm6a    | GPM6A    | glycoprotein M6A                                                                                              | Plasma Membrane     | ion channel             |
| -2.102 | Slc16a4  | SLC16A4  | solute carrier family 16, member 4 (monocarboxylic acid transporter 5)                                        | Plasma Membrane     | transporter             |
| -2.100 | Mal      | MAL      | mal, T-cell differentiation protein                                                                           | Plasma Membrane     | transporter             |
| -2.099 | Timeless | TIMELESS | timeless homolog (Drosophila)                                                                                 | Nucleus             | other                   |
| -2.098 | Tpx2     | TPX2     | TPX2, microtubule-associated, homolog (Xenopus laevis)                                                        | Nucleus             | other                   |
| -2.095 | Pdss1    | PDSS1    | prenyl (decaprenyl) diphosphate synthase, subunit 1                                                           | unknown             | enzyme                  |
| -2.095 | Timp1    | TIMP1    | TIMP metalloproteinase inhibitor 1                                                                            | Extracellular Space | other                   |
| -2.093 | Cd244    | CD244    | CD244 molecule, natural killer cell receptor 2B4                                                              | Plasma Membrane     | other                   |
| -2.092 | Mfap5    | MFAP5    | microfibrillar associated protein 5                                                                           | Extracellular Space | other                   |
| -2.085 | Als2cr12 | ALS2CR12 | amyotrophic lateral sclerosis 2 (juvenile) chromosome region, candidate 12                                    | unknown             | other                   |
| -2.083 | Tns4     | TNS4     | tensin 4                                                                                                      | Cytoplasm           | other                   |
| -2.080 | Spbc24   | SPC24    | SPC24, NDC80 kinetochore complex component, homolog (S. cerevisiae)                                           | unknown             | other                   |
| -2.079 | AI449441 | PIF1     | PIF1 5'-to-3' DNA helicase homolog (S. cerevisiae)                                                            | Nucleus             | enzyme                  |
| -2.079 | Stat4    | STAT4    | signal transducer and activator of transcription 4                                                            | Nucleus             | transcription regulator |
| -2.078 | Mal2     | MAL2     | mal, T-cell differentiation protein 2                                                                         | Plasma Membrane     | transporter             |
| -2.073 | Uhrf1    | UHRF1    | ubiquitin-like with PHD and ring finger domains 1                                                             | Nucleus             | transcription regulator |
| -2.069 | Dpcr1    | DPCR1    | diffuse panbronchiolitis critical region 1                                                                    | unknown             | other                   |
| -2.069 | Prim1    | PRIM1    | primase, DNA, polypeptide 1 (49kDa)                                                                           | Nucleus             | enzyme                  |
| -2.066 | Kif14    | KIF14    | kinesin family member 14                                                                                      | Cytoplasm           | other                   |
| -2.065 | Asb15    | ASB15    | ankyrin repeat and SOCS box-containing 15                                                                     | Nucleus             | transcription regulator |
| -2.063 | Gins4    | GINS4    | GINS complex subunit 4 (Sld5 homolog)                                                                         | unknown             | other                   |
| -2.063 | Timp1    | TIMP1    | TIMP metalloproteinase inhibitor 1                                                                            | Extracellular Space | other                   |
| -2.061 | Bard1    | BARD1    | BRCA1 associated RING domain 1                                                                                | Nucleus             | transcription regulator |
| -2.060 | Racgap1  | RACGAP1  | Rac GTPase activating protein 1                                                                               | Cytoplasm           | transporter             |
| -2.059 | Smyd1    | SMYD1    | SET and MYND domain containing 1                                                                              | Nucleus             | transcription regulator |
| -2.059 | Tacc3    | TACC3    | transforming, acidic coiled-coil containing protein 3                                                         | Nucleus             | other                   |
| -2.056 | Timeless | TIMELESS | timeless homolog (Drosophila)                                                                                 | Nucleus             | other                   |
| -2.056 | Timeless | TIMELESS | timeless homolog (Drosophila)                                                                                 | Nucleus             | other                   |
| -2.053 | Elmod1   | ELMOD1   | ELMO/CED-12 domain containing 1                                                                               | unknown             | other                   |
| -2.052 | Depdc1b  | DEPDC1B  | DEP domain containing 1B                                                                                      | unknown             | other                   |
| -2.047 | Cdh3     | CDH3     | cadherin 3, type 1, P-cadherin (placental)                                                                    | Plasma Membrane     | other                   |
| -2.046 | Cdc6     | CDC6     | cell division cycle 6 homolog (S. cerevisiae)                                                                 | Nucleus             | other                   |

|        |          |          |                                                                                               |                     |                            |
|--------|----------|----------|-----------------------------------------------------------------------------------------------|---------------------|----------------------------|
| -2.045 | Cdca3    | CDCA3    | cell division cycle associated 3                                                              | Cytoplasm           | other                      |
| -2.045 | Plk4     | PLK4     | polo-like kinase 4                                                                            | Cytoplasm           | kinase                     |
| -2.043 | Plk4     | PLK4     | polo-like kinase 4                                                                            | Cytoplasm           | kinase                     |
| -2.040 | Lin9     | LIN9     | lin-9 homolog (C. elegans)                                                                    | Nucleus             | other                      |
| -2.039 | Epn3     | EPN3     | epsin 3                                                                                       | Cytoplasm           | other                      |
| -2.039 | Hmgb2    | HMGB2    | high-mobility group box 2                                                                     | Nucleus             | transcription regulator    |
| -2.037 | Nek2     | NEK2     | NIMA (never in mitosis gene a)-related kinase 2                                               | Cytoplasm           | kinase                     |
| -2.037 | Tacc3    | TACC3    | transforming, acidic coiled-coil containing protein 3                                         | Nucleus             | other                      |
| -2.037 | Timp1    | TIMP1    | TIMP metalloproteinase inhibitor 1                                                            | Extracellular Space | other                      |
| -2.030 | Tacc3    | TACC3    | transforming, acidic coiled-coil containing protein 3                                         | Nucleus             | other                      |
| -2.029 | Mfap5    | MFAP5    | microfibrillar associated protein 5                                                           | Extracellular Space | other                      |
| -2.023 | Snail    | SNAIL    | snail homolog 1 (Drosophila)                                                                  | Nucleus             | other                      |
| -2.017 | Mbnl3    | MBNL3    | muscleblind-like 3 (Drosophila)                                                               | Nucleus             | other                      |
| -2.016 | Serpine1 | SERPINE1 | serpin peptidase inhibitor, clade E (nexin, plasminogen activator inhibitor type 1), member 1 | Extracellular Space | other                      |
| -2.011 | Acsm3    | ACSM3    | acyl-CoA synthetase medium-chain family member 3                                              | Cytoplasm           | enzyme                     |
| -2.011 | Rfc5     | RFC5     | replication factor C (activator 1) 5, 36.5kDa                                                 | Nucleus             | enzyme                     |
| -2.009 | Spbc24   | SPC24    | SPC24, NDC80 kinetochore complex component, homolog (S. cerevisiae)                           | unknown             | other                      |
| -2.003 | Serpine1 | SERPINE1 | serpin peptidase inhibitor, clade E (nexin, plasminogen activator inhibitor type 1), member 1 | Extracellular Space | other                      |
| -2.002 | Blm      | BLM      | Bloom syndrome, RecQ helicase-like                                                            | Nucleus             | enzyme                     |
| 3.681  | Mmp12    | MMP12    | matrix metalloproteinase 12 (macrophage elastase)                                             | Extracellular Space | peptidase                  |
| 3.068  | Kit      | KIT      | v-kit Hardy-Zuckerman 4 feline sarcoma viral oncogene homolog                                 | Plasma Membrane     | kinase                     |
| 3.024  | Grm7     | GRM7     | glutamate receptor, metabotropic 7                                                            | Plasma Membrane     | G-protein coupled receptor |
| 3.015  | Kit      | KIT      | v-kit Hardy-Zuckerman 4 feline sarcoma viral oncogene homolog                                 | Plasma Membrane     | kinase                     |
| 2.957  | Mmp3     | MMP3     | matrix metalloproteinase 3 (stromelysin 1, progelatinase)                                     | Extracellular Space | peptidase                  |
| 2.938  | Kit      | KIT      | v-kit Hardy-Zuckerman 4 feline sarcoma viral oncogene homolog                                 | Plasma Membrane     | kinase                     |
| 2.847  | Ccdc3    | CCDC3    | coiled-coil domain containing 3                                                               | Cytoplasm           | other                      |
| 2.719  | AI317395 | AI317395 | expressed sequence AI317395                                                                   | unknown             | peptidase                  |
| 2.67   | Ces3     | CES3     | carboxylesterase 3                                                                            | Cytoplasm           | enzyme                     |
| 2.509  | Kcnj2    | KCNJ2    | potassium inwardly-rectifying channel, subfamily J, member 2                                  | Plasma Membrane     | ion channel                |
| 2.474  | Ces3     | CES3     | carboxylesterase 3                                                                            | Cytoplasm           | enzyme                     |
| 2.378  | Mmp13    | MMP13    | matrix metalloproteinase 13 (collagenase 3)                                                   | Extracellular Space | peptidase                  |
| 2.368  | Mamdc2   | MAMDC2   | MAM domain containing 2                                                                       | Extracellular Space | other                      |
| 2.316  | Pappa2   | PAPPA2   | pappalysin 2                                                                                  | Extracellular Space | peptidase                  |
| 2.304  | Saa3     | saa3p    | serum amyloid A3 pseudogene                                                                   | unknown             | other                      |
| 2.3    | Slc40a1  | SLC40A1  | solute carrier family 40 (iron-regulated transporter), member 1                               | Plasma Membrane     | transporter                |
| 2.281  | Tmod1    | TMOD1    | tropomodulin 1                                                                                | Cytoplasm           | enzyme                     |
| 2.254  | Cfh      | CFH      | complement factor H                                                                           | Extracellular Space | other                      |

|       |          |         |                                                                            |                     |                        |
|-------|----------|---------|----------------------------------------------------------------------------|---------------------|------------------------|
| 2.249 | Slc40a1  | SLC40A1 | solute carrier family 40 (iron-regulated transporter), member 1            | Plasma Membrane     | transporter            |
| 2.241 | Gadd45a  | GADD45A | growth arrest and DNA-damage-inducible, alpha                              | Nucleus             | other                  |
| 2.212 | BC026782 | CFHR2   | complement factor H-related 2                                              | Extracellular Space | other                  |
| 2.206 | Cfh      | CFH     | complement factor H                                                        | Extracellular Space | other                  |
| 2.179 | Rgs7     | RGS7    | regulator of G-protein signaling 7                                         | Cytoplasm           | enzyme                 |
| 2.174 | Mamdc2   | MAMDC2  | MAM domain containing 2                                                    | Extracellular Space | other                  |
| 2.152 | Svep1    | SVEP1   | sushi, von Willebrand factor type A, EGF and pentraxin domain containing 1 | Cytoplasm           | other                  |
| 2.115 | C4b      | C4A/C4B | complement component 4B (Chido blood group)                                | Extracellular Space | other                  |
| 2.112 | C4b      | C4A/C4B | complement component 4B (Chido blood group)                                | Extracellular Space | other                  |
| 2.1   | BC005764 | LPPR3   | lipid phosphate phosphatase-related protein type 3                         | unknown             | other                  |
| 2.098 | Colec12  | COLEC12 | collectin sub-family member 12                                             | Plasma Membrane     | transmembrane receptor |
| 2.096 | Nyx      | NYX     | Nyctalopin                                                                 | Extracellular Space | other                  |
| 2.079 | Xpa      | XPA     | xeroderma pigmentosum, complementation group A                             | Nucleus             | other                  |
| 2.07  | Opcml    | OPCML   | opioid binding protein/cell adhesion molecule-like                         | Plasma Membrane     | transmembrane receptor |
| 2.067 | Vwf      | VWF     | von Willebrand factor                                                      | Extracellular Space | other                  |
| 2.008 | Gpnmb    | GPNMB   | glycoprotein (transmembrane) nmb                                           | Plasma Membrane     | enzyme                 |
| 2.005 | Plxdc1   | PLXDC1  | plexin domain containing 1                                                 | Plasma Membrane     | other                  |
| 2.002 | Kif21b   | KIF21B  | kinesin family member 21B                                                  | Cytoplasm           | other                  |

**Supplemental Table 3: Imatinib Mesylate Alters Gene Expression Patterns in Multiple Networks in Vascular Smooth Muscle Cells**

| <b>ID</b> | <b>Score</b> | <b>Focus Molecules</b> | <b>Top Functions</b>                                                                       | <b>Molecules in Network</b>                                                                                                                                                                                                                                                                                                     |
|-----------|--------------|------------------------|--------------------------------------------------------------------------------------------|---------------------------------------------------------------------------------------------------------------------------------------------------------------------------------------------------------------------------------------------------------------------------------------------------------------------------------|
| 1         | 56           | 30                     | Cell Cycle, DNA Replication, Recombination, and Repair, Cellular Assembly and Organization | Akt, ATPase, AURKA, BARD1, BIRC5, BLM, BRCA1, BRCA1-BRCA2-FANCD2-FANCN-RAD51, CCNE2, CENPF, EXO1, FANCB, FANCD2, FXYD3, HELLS, Ige, KIF15, KIF22, KIF20B, KIF2C, LIN9, MELK, MKI67, NCAPG2, NID2, PMCH, RAD51, RAD51AP1, RAD54L, RRM2, SMC2, SPAG5, STIL, TPX2, Vegf                                                            |
| 2         | 48           | 28                     | Cell Cycle, Cellular Assembly and Organization, DNA Replication, Recombination, and Repair | alcohol group acceptor phosphotransferase, APC, AURKB, BUB1, BUB1B, CASC5, CCNA2, CCNB1, Cdc2, CDC20, Cdc25B/C, CDC25C, CENPE, CHEK1, CLSPN, Cyclin B, ERCC6L, ERK1/2, ESPL1, FBXO5, FOXM1, KIF11, MAD2L1, Mpf, NDC80, NEK2, NUF2, PLK1, PRC1, SGOL1, SGOL2, SPC24, TIMELESS, TK1, TTK                                          |
| 3         | 40           | 23                     | Cell Cycle, Cellular Movement, Cancer                                                      | 14-3-3, ADAM12, BRIP1, CD244, CDC6, CDC45, Cyclin A, Cyclin E, E2f, ECT2, Gamma tubulin, KIF23, KIT, MAP2K1/2, Mcm, MCM5, MCM6, MCM10, MSLN, MYBL2, NTRK3, NUSAP1, ORC1, p85 (pik3r), PI3K (complex), PLK4, PRR11, RACGAP1, Raf, Rb, RGS7, RPA, SHCBP1, SNAI1, TOP2A                                                            |
| 4         | 39           | 23                     | Cell Cycle, Cellular Movement, DNA Replication, Recombination, and Repair                  | ANLN, ASB15, ASPM, BAG6, C14orf106, CAB39L, CCDC99, CDCA3, CDKN1A, CEP55, CES2, CTSW, DLGAP5, EXO1, FIGNL1, HJURP, HNF4A, KIAA0101, KIF20A, KNTC1, LPPR3, MAL2, NCAPD3, NUSAP1, PCBD1, PERP, SHOX, SLC16A4, SMC2, STK11, TCF19, TP53, TPX2, TTK, WDHD1                                                                          |
| 5         | 31           | 19                     | Immunological Disease, Inflammatory Disease, Renal Nephritis                               | Ap1, ASF1B, C4A/C4B, CCNE1, CFH, CHTF18, COPG, DNA-directed DNA polymerase, EME1, GADD45A, GPNMB, GSG2, HISTONE, Histone H1, Histone h3, Histone h4, Hsp90, IgG, IL6, IL12 (complex), IL12 (family), Interferon alpha, Jnk, KLK8, LDL, P38 MAPK, PDGF BB, POLE, POLQ, PRIM1, PRSS35, RFC5, STAT4, STAT5a/b, UHRF1               |
| 6         | 29           | 18                     | Connective Tissue Disorders, Genetic Disorder, Tissue Morphology                           | Casein, COL11A1, COL3A1, collagen, Collagen type I, Collagen type III, Collagen type IV, Collagen(s), E2F7, E2F8, Elastase, ETS, Fibrinogen, IL1, IL-1R, IL18RAP, IL1RL1, ITGB6, Laminin, MFAP5, MMP3, MMP12, MMP13, Nfkb (complex), Nfkb1-RelA, PBK, Pdgf (complex), SAA, saa3p, SERPINE1, Tgf beta, TIMP1, TLL1, TNFSF18, VWF |
| 7         | 24           | 16                     | Cancer, Tissue Morphology, Cell Cycle                                                      | ACSM3, ANLN, beta-estradiol, Cadherin (E,N,P,VE), CDH3, CDH4, COLEC12, CTNNB1, DDIT4, ERCC4, FOXO1, HLA-DQA1, HTRA1, KIF18A, LEFTY2, MCM5, MYH2, MYH4, MYH6, MYL7, MYL12B, NRIP3, PLXDC1, PPIL5, PRC1, PRSS23, PTPRK, RRM2, Sox, SOX11, TACC3, TCF/LEF, TERT, TK1, XPA                                                          |
| 8         | 21           | 14                     | Cell-To-Cell Signaling and Interaction, Tissue Development, Cellular Movement              | ADAM12, ADAMTS4, ALS2CR12, ANXA11, ASPM, BCAN, BYSL, C13orf15, CD97, CES3, CMA1, DDR2, EGFR, FN1, GCNT3, GJB3, HNF1A, HTRA1, KCNQ3, KIF20A, KIF21B, KRT18, MIA2, MKI67, MXD3, PTGER1, SHC2, SPRR2A (includes others), SRC, SVEP1, TGFB1, TNFSF13B, TNS4, TRO, TROP                                                              |
| 9         | 19           | 13                     | Organ Morphology, Organismal Injury and Abnormalities, Connective Tissue Disorders         | ACADL, ADAMTS5, ALDOC, CENPB, CMAH, COL9A1, DECR1, EIF3G, ELMOD1, ESR1, ethanol, GPM6A, HDAC1, HMGB2, HTT, IL4, KCNAB1, KCNAB2, KIF14, MAL, MATN3, MLF1, NR3C1, Nuclear factor 1, OPCML, POU3F1, RIPK2, SLC40A1, SMYD1, SPRR1A, TFF3, Thymidine Kinase, TMOD1, Trim30a/Trim30d                                                  |
| 10        | 15           | 11                     | Cellular Movement, Inflammatory Disease, Cellular Development                              | 26s Proteasome, AKAP5, Alpha tubulin, Caspase, CDCA5, CENPI, Ck2, CMKLR1, DLGAP5, DTL, EDN2, ERK, F2RL1, FFAR2, Focal adhesion kinase, FSH, Gpcr, GPR77, GPR172B, GRM7, Gα12/13, hCG, Insulin, KCNJ2, Lh, LPAR3, Mapk, Mmp, Pka, Pkc(s), PP2A, RNA polymerase II, S1PR5, STAT, Ubiquitin                                        |
| 11        | 15           | 11                     | Cell Cycle, Cellular Growth and Proliferation, Carbohydrate Metabolism                     | ALDH9A1, ASXL1, CCDC99, CD53, CDCA2, CDCA7, CDK1, CDKN3, CKS2, CNOT1, CORO1C, ENPP2, EPN3, Epsin, HIST1H1A, HIST1H1B, HSPA2, ICAM3, ITGB1, KNTC1, LATS2, MIR124 (human), MPRIP, NASP, NDUFA13, PAPP2, PHF19, PLS3, PPPICC, SASS6, SYNPO, TOP2B, tretinoin, ZW10, ZWILCH                                                         |



## Supplemental Figure Legends

### Supplemental Figure 1. Imatinib impaired lymphoma growth by inducing apoptosis. A-C:

TUNEL assay of Farage (A), OCI-Ly7 (B), and Karpas422 (C) tumors treated with either PBS (1) or imatinib (2), and then quantified as apoptosis index estimated as percent of tumor areas positive for TUNEL staining (3). Scale bar = 100  $\mu$ m.

### Supplemental Figure 2. FACS analysis of day 14 EL4 tumor vascular cell populations. A:

Percentage of CD45<sup>+</sup> and CD45<sup>-</sup> cells. B: Percentage of CD45<sup>+</sup>CD11b<sup>+</sup> inflammatory cells. C: Quad-gate analysis of percentage of CD45<sup>-</sup>CD11b<sup>-</sup> cells. Q1 group represents CD45<sup>-</sup>CD11b<sup>-</sup>CD31<sup>+</sup>PDGFR $\beta$ <sup>-</sup> endothelial cells, Q2 group represents CD45<sup>-</sup>CD11b<sup>-</sup>CD31<sup>+</sup>PDGFR $\beta$ <sup>+</sup> endothelial cells, Q3 group represents CD45<sup>-</sup>CD11b<sup>-</sup>CD31<sup>-</sup>PDGFR $\beta$ <sup>-</sup> stromal cells, while Q4 group represents CD45<sup>-</sup>CD11b<sup>-</sup>CD31<sup>-</sup>PDGFR $\beta$ <sup>+</sup> pericytes. The PDGFR $\beta$ -PE relative mean fluorescence values for the CD45<sup>-</sup>CD11b<sup>-</sup> cells were: 281.39 for Q1, 4243.75 for Q2, 137.37 for Q3, and 5579.45 for Q4.

### Supplemental Figure 3. FACS analysis of lymphoma vascular cell populations. A:

Quad-gate analysis of the OCI-Ly7 model. Murine EPC as hCD45<sup>-</sup>mCD45<sup>-</sup>VEGFR2<sup>+</sup>CD117<sup>+</sup>, mature EC as hCD45<sup>-</sup>mCD45<sup>-</sup>VEGFR2<sup>+</sup>CD31<sup>+</sup>, murine PPC as hCD45<sup>-</sup>mCD45<sup>-</sup>CD140b<sup>+</sup>CD117<sup>+</sup>, and mature PC as hCD45<sup>-</sup>mCD45<sup>-</sup>CD140b<sup>+</sup>. Blue-dotted squares outline individual quad-gates for EPC, PPC, EC and PC. B: Quantification of stromal cell populations in OCI-Ly7 tumors treated with imatinib vs. PBS. “\*” denotes p<0.05, compared with control.

### Supplemental Figure 4. Imatinib induced apoptosis of PDGFR $\beta$ <sup>+</sup> VSMC *in vitro*.

PDGFR $\beta$ <sup>+</sup> VSMCs cultured in the absence (1-3) and presence (4-6) of imatinib. 1&4: Morphology by phase contrast light microscopy. 2&5: Detection of PDGFR $\beta$  (2), and cleaved

caspase 3 following imatinib (**5**, white arrow). **3&6**: Detection of  $\alpha$ -SMA (**3**), and cleaved caspase 3 following imatinib treatment (**6**).

**Supplemental Figure 5. Imatinib induced a PDGF-BB-specific anti-proliferative gene expression signature in vascular mural cells.** **A, B**: Ingenuity Pathway analysis of networks of differentially expressed genes. VEGF target genes were highlighted in **A**, while TGF- $\beta$  target genes were highlighted in **B**. Green color denotes down-regulated genes, while red color indicates up-regulated genes. **C**: qPCR analysis of representative differentially expressed genes related to PDGF-BB and PDGFR $\beta$  pathways in cultured primary murine vascular smooth muscle cells at 24h and 48h following imatinib treatment (**1**), or in FACS-sorted CD45<sup>-</sup>PDGFR $\beta$ <sup>+</sup> lymphoma-associated stromal cells, harvested 72h following imatinib treatment (**2**). Results are expressed as “fold change” relative to baseline levels.

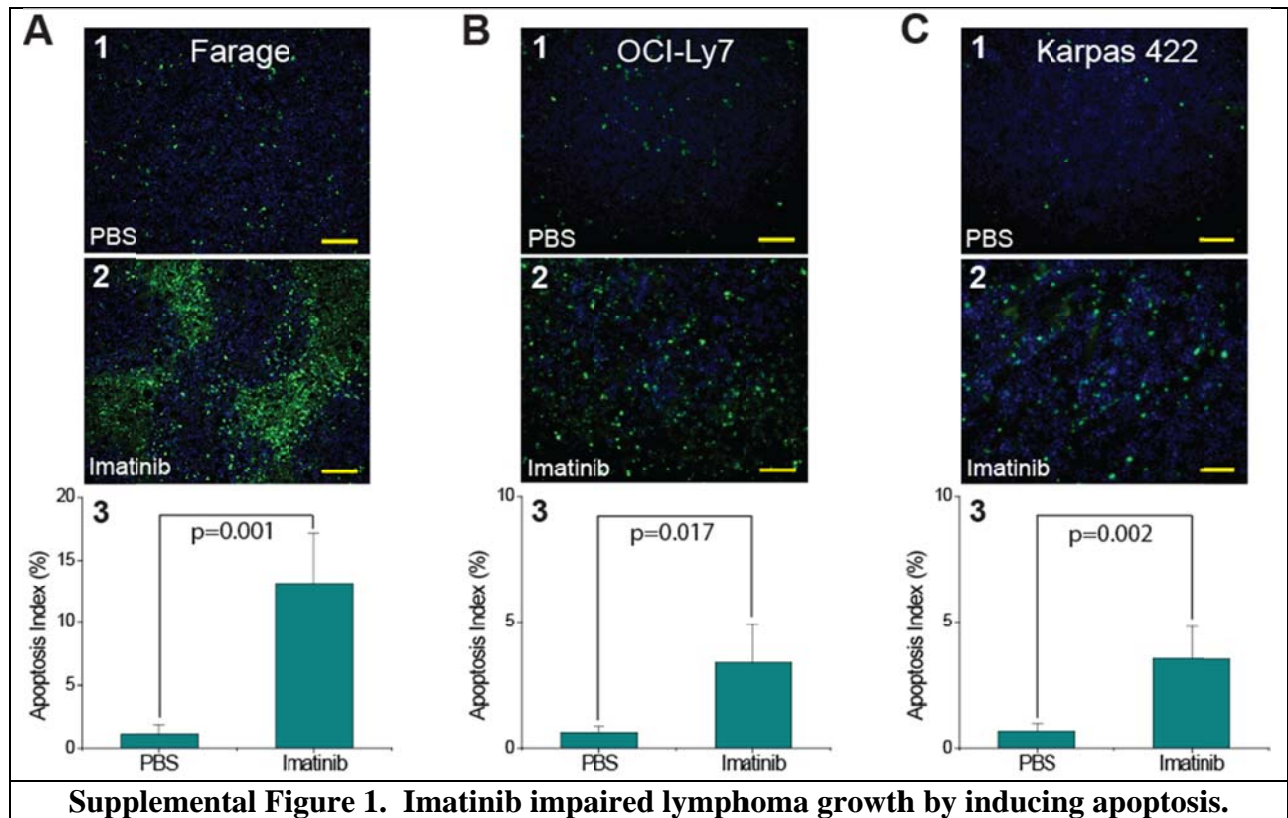

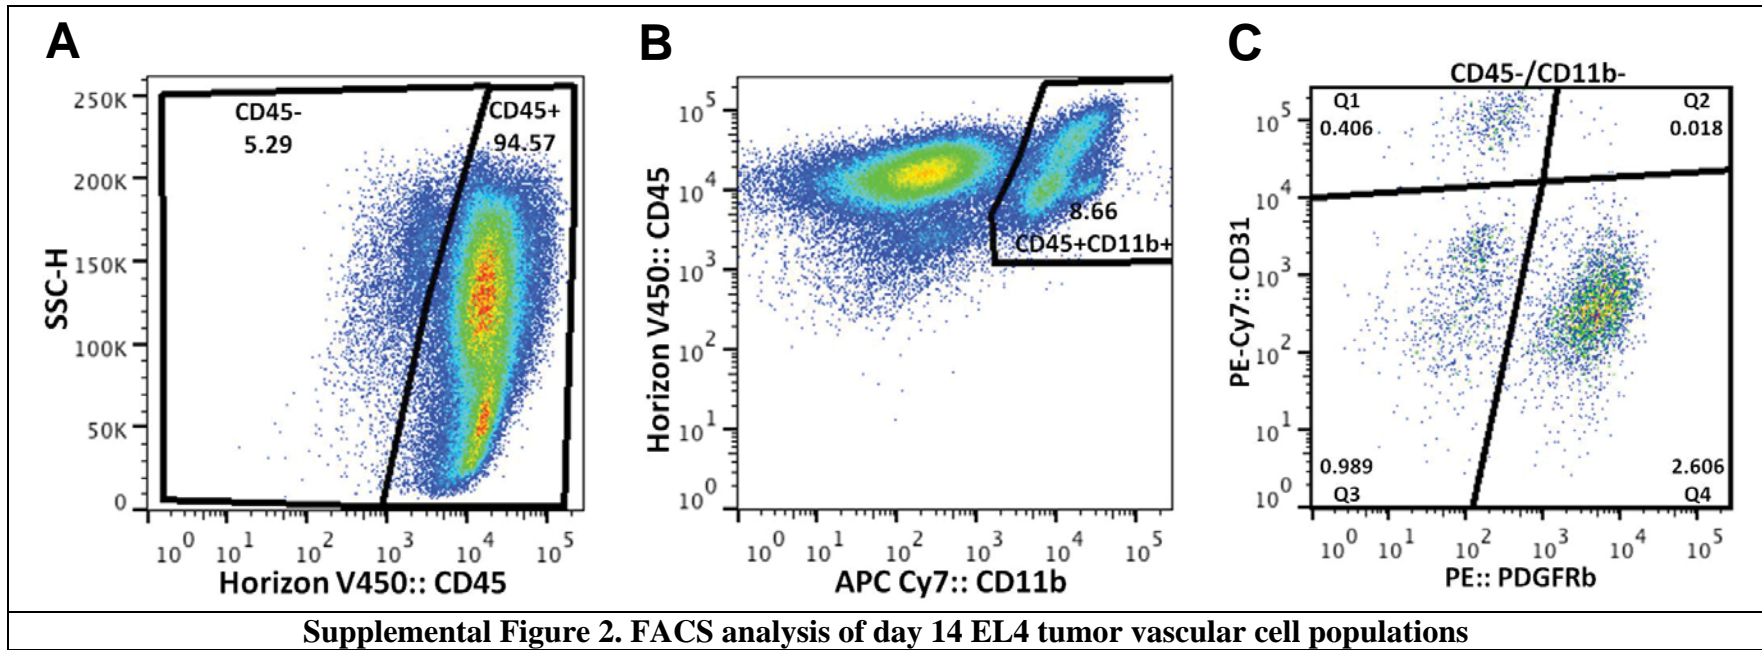

**A**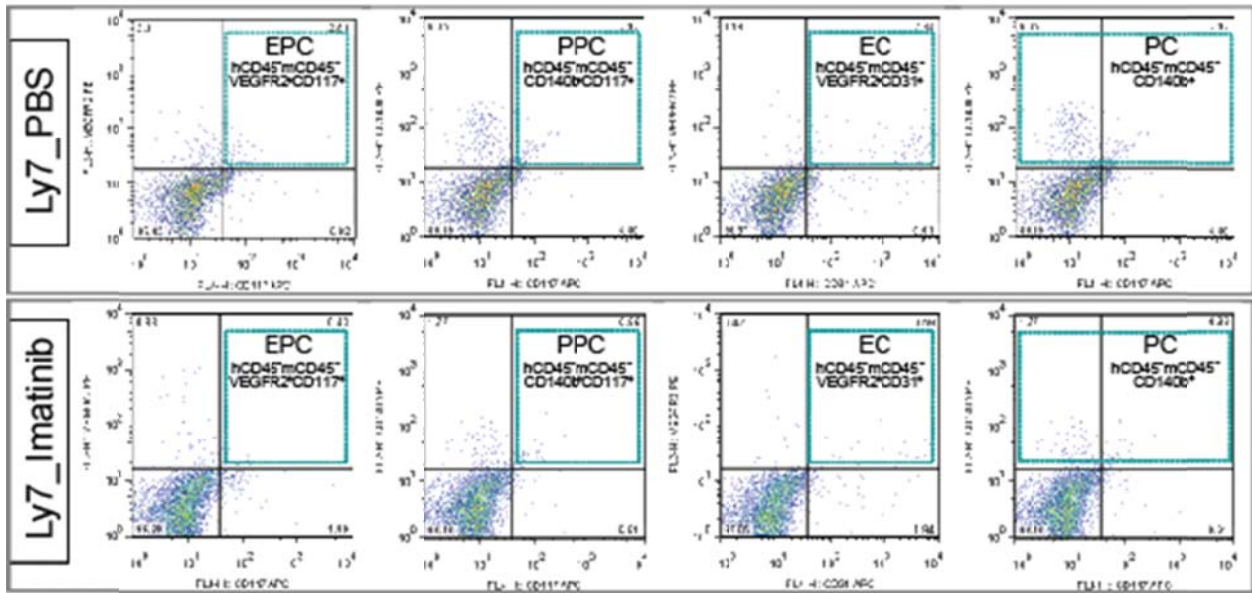**B**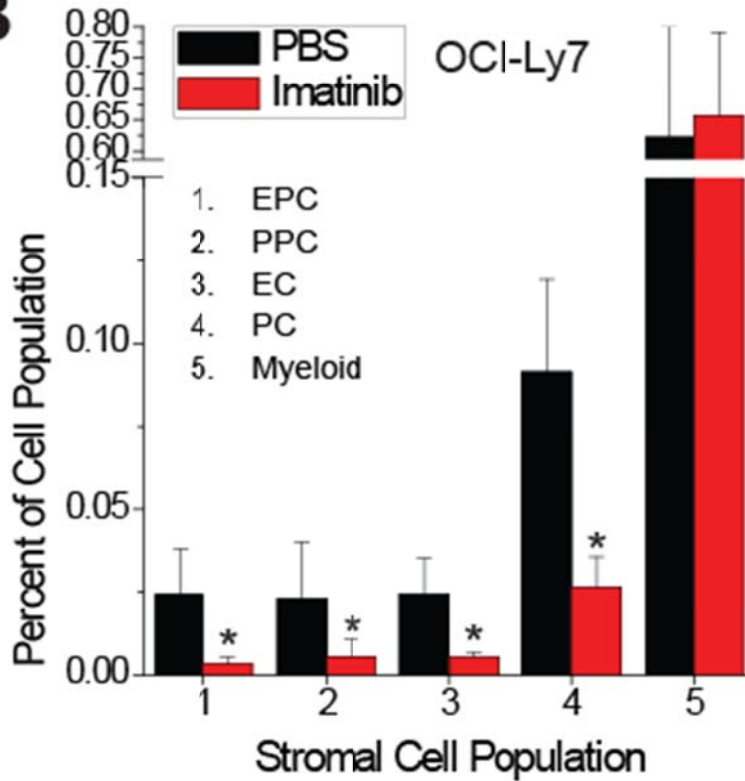

Supplemental Figure 3. FACS analysis of lymphoma vascular cell populations

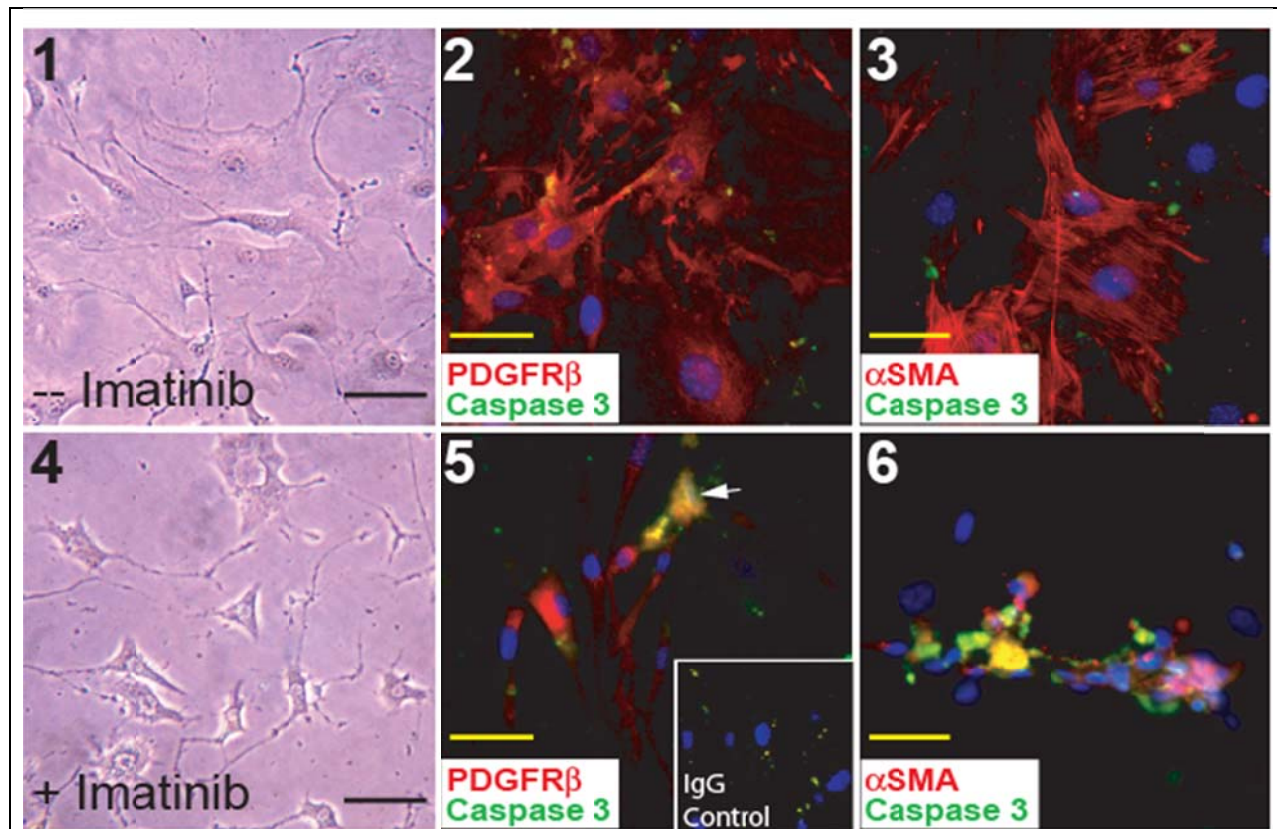

Supplemental Figure 4. Imatinib induced apoptosis of PDGFR $\beta^+$  VSMC *in vitro*.



**A**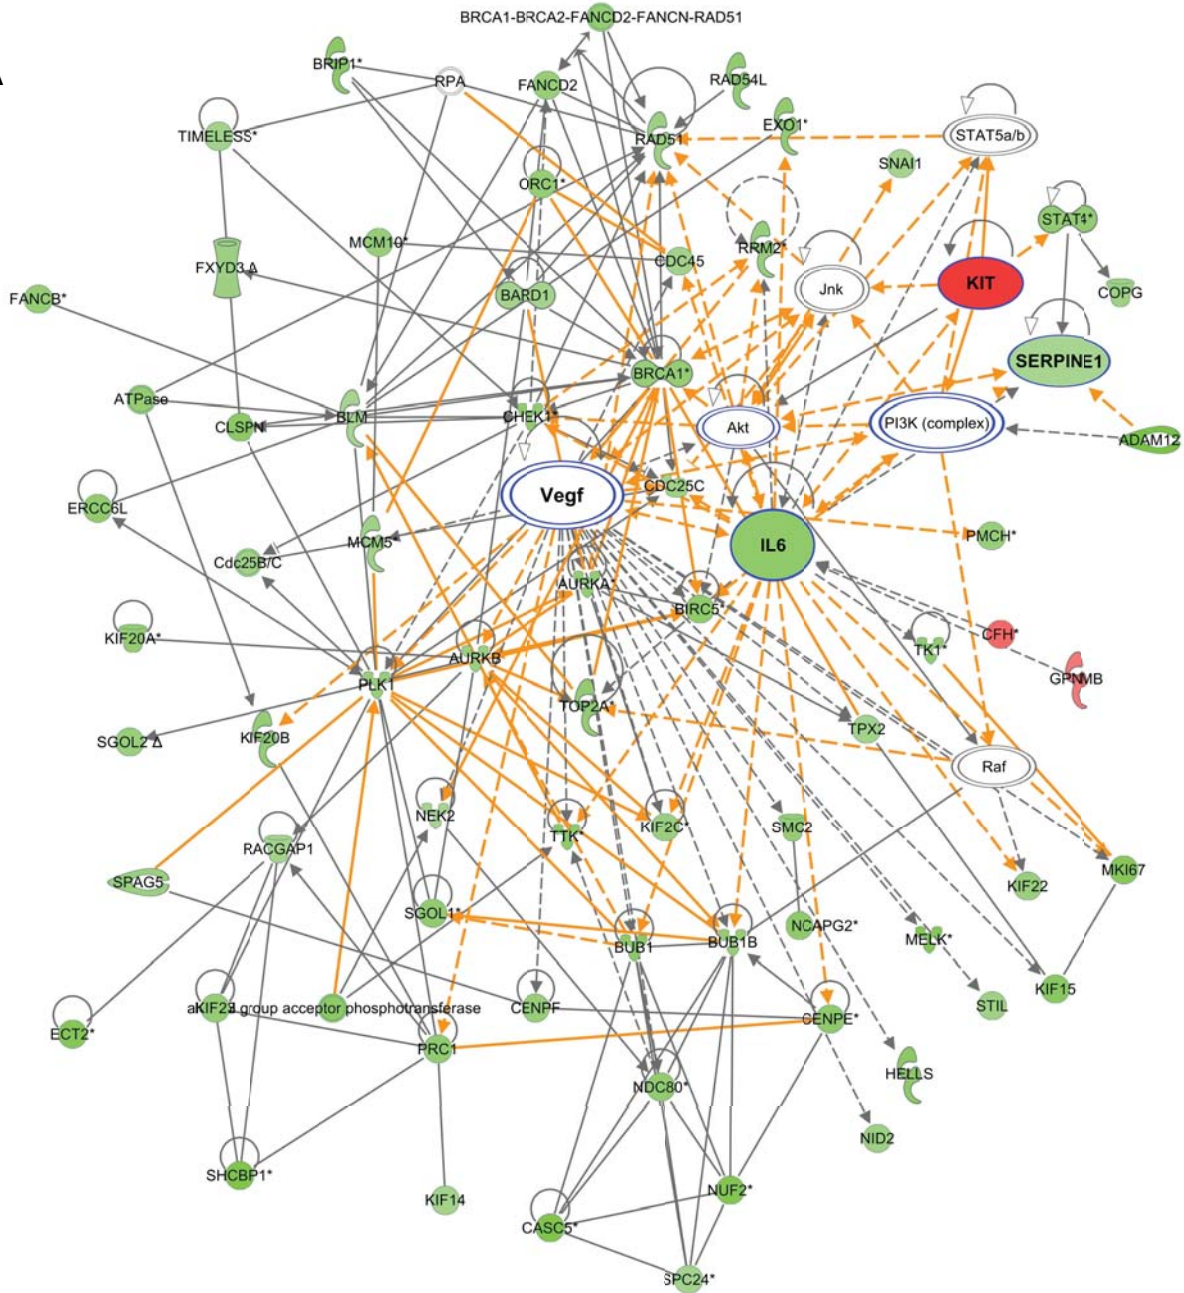

**Supplemental Figure 5. Imatinib induced an anti-proliferative gene expression signature in vascular mural cells.**

**B**

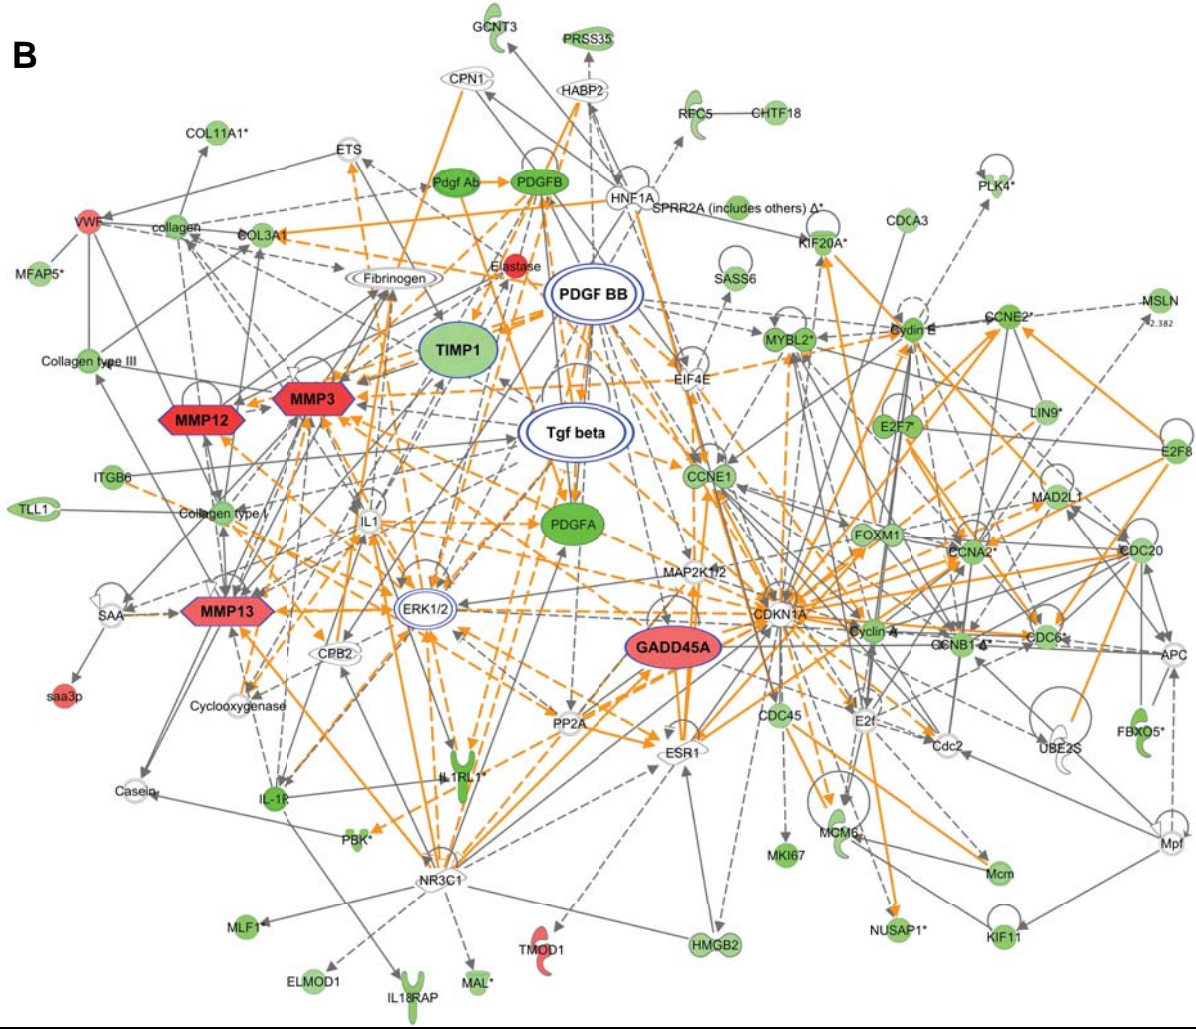

**Supplemental Figure 5 (cont). Imatinib induced an anti-proliferative gene expression signature in vascular mural cells.**



**C 1**

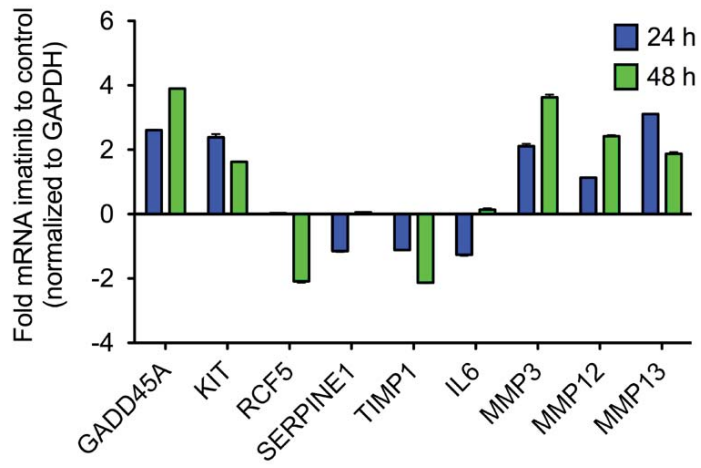

**2**

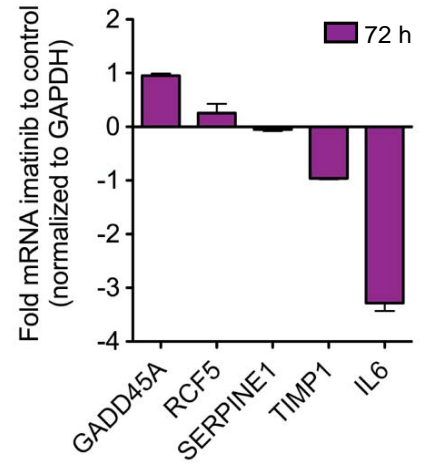

**Supplemental Figure 5 (cont). Imatinib induced an anti-proliferative gene expression signature in vascular mural cells.**
